# Supplementary material for: The ace-1 Locus Is Amplified in All Resistant Anopheles gambiae Mosquitoes: Fitness Consequences of Homogeneous and Heterogeneous Duplications
Source: PLOS journal article supplement (doi:10.1371/journal.pbio.2000618), 2016-12-05

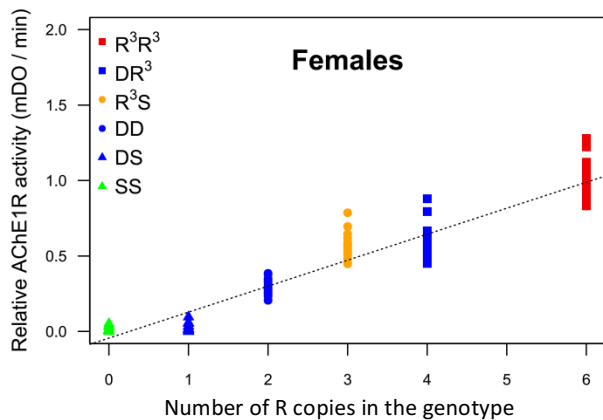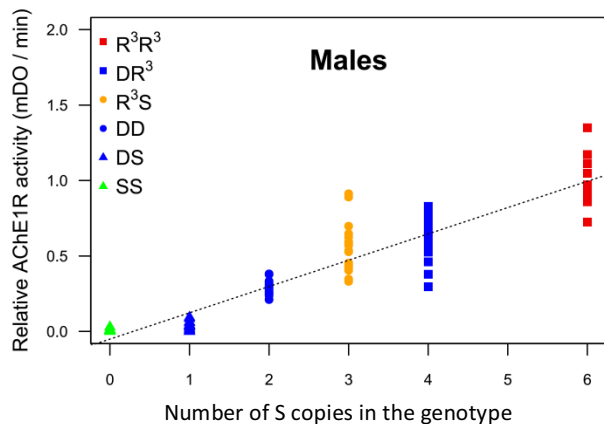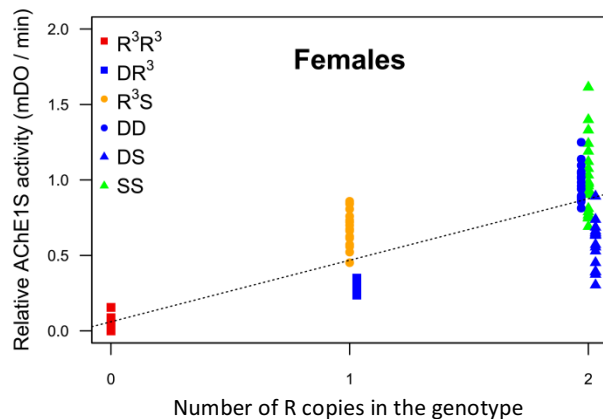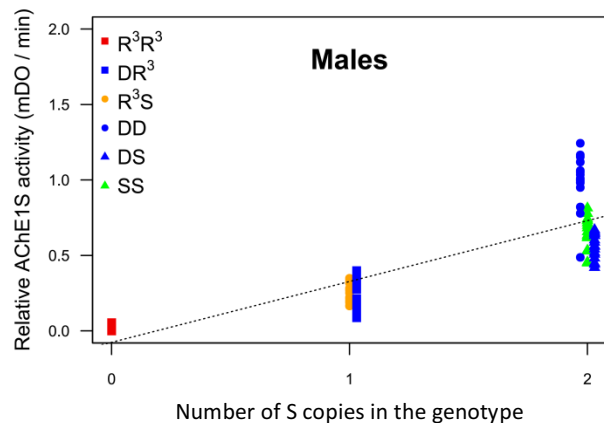

Supplement: S2 (10.1371/journal.pbio.2000618.s002) [file journal.pbio.2000618.s002]
